# Supplementary material
Source: PubMed Central journal article supplement (PMC7859928)
Supplement: ac0c04572_si_001.pdf [file ac0c04572_si_001.pdf]

# Supporting information

## Mass spectrometry spatial-omics on a single conductive slide

Stephanie T.P. Mezger<sup>1,2,3</sup>, Alma M.A. Mingels<sup>2,3</sup>, Otto Bekers<sup>2,3</sup>, Ron M.A. Heeren<sup>1</sup> and Berta Cillero-Pastor<sup>1\*</sup>

<sup>1</sup> Maastricht MultiModal Molecular Imaging (M4I) Institute, Division of Imaging Mass Spectrometry, Maastricht University, Universiteitssingel 50, 6229 ER Maastricht, The Netherlands; <sup>2</sup> Central Diagnostic Laboratory, Maastricht University Medical Center, P.O. Box 5800, 6202 AZ Maastricht, The Netherlands; <sup>3</sup> CARIM School for Cardiovascular diseases, Maastricht University, Universiteitssingel 50, 6229 ER Maastricht, The Netherlands

\* corresponding author, email: b.cilleropastor@maastrichtuniversity.nl

### Figures:

Supporting figure S1: Images of the dissected tissue after LMD

Supporting figure S2: Proteins identified from PEN membrane and ITO slides after H&E staining

Supporting figure S3: Categorized representation of the cellular components found after LMD on both frozen and FFPE tissue

Supporting figure S4: Cellular components found in frozen tissue before and after negative lipid MALDI-MSI

Supporting figure S5: All cellular components found in FFPE tissue before and after metabolite MALDI-MSI

Supporting figure S6: Cellular component analysis of the significant components found in the two clusters dissected after positive lipid MALDI-MSI

### Tables:

Supporting table S1: Number of cellular components and proteins after LMD on both frozen and FFPE tissue

Supporting table S2: Top 10 cellular components from frozen and FFPE tissue comparison laser settings

Supporting table S3: Top 10 cellular components from conductive slide before and after MALDI-MSI

Supporting table S4: Number of cellular components and proteins from frozen tissue before and after (positive or negative) lipid MALDI-MSI

Supporting table S5: Number of cellular components and proteins from FFPE tissue before and after metabolite MALDI-MSI

Supporting table S6: Number of cellular components and proteins from cluster 1 and 2 after positive lipid MALDI-MSI

Supporting table S7: Pathway analysis from clusters 1 and 2 after positive lipid MALDI-MSI

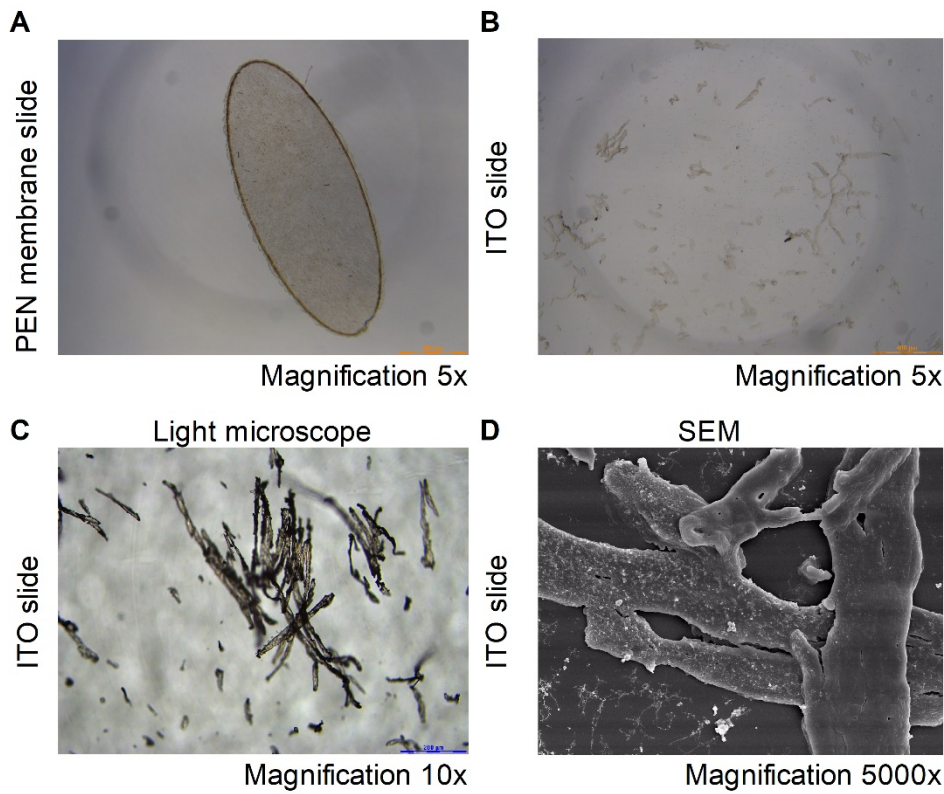

**Supporting Figure S1.** Images of the dissected tissue after laser capture microdissection (LMD). Tissue collected from (A) a PEN membrane slide and (B) an ITO slide, using a 5x magnification. The collected tissue from an ITO slide imaged (C) with a 10x magnification, and (D) using scanning electron microscopy (SEM) with a 5000x magnification.

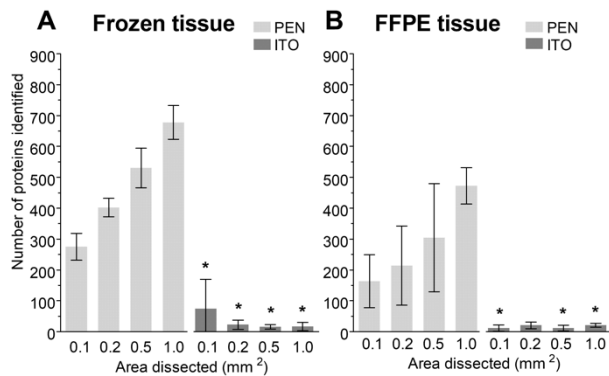

**Supporting Figure S2.** Proteins identified from PEN membrane and ITO slides after H&E staining, for (A) frozen tissue and (B) FFPE tissue. Data are presented as mean  $\pm$  SD, \* indicate  $p < 0.05$  when comparing equal areas from PEN membrane vs ITO slides.

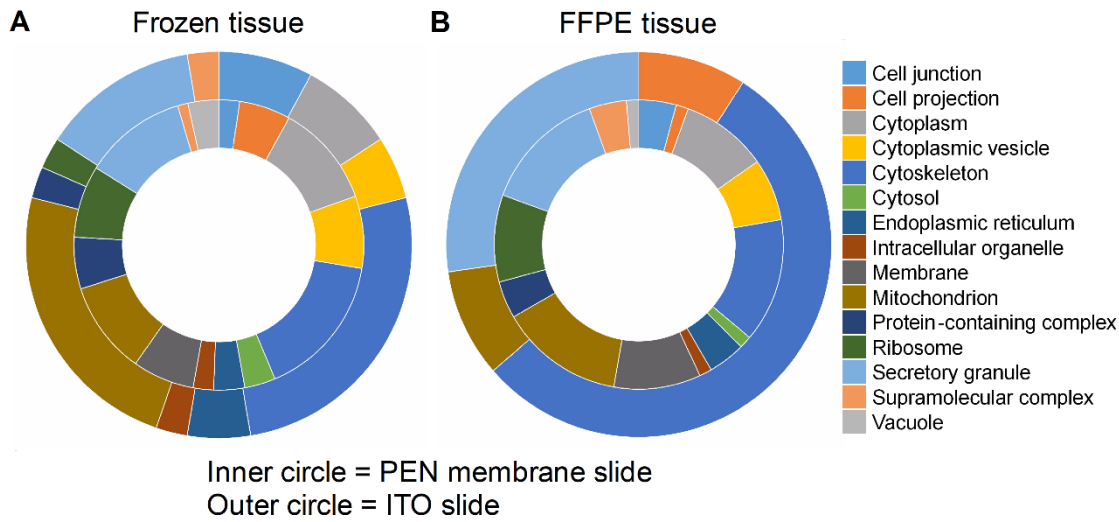

**Supporting Figure S3. Categorized representation of the cellular components found after LMD on both frozen (A) and FFPE (B) tissue.** For this analysis, all significant components ( $p < 0.05$ ) were considered. Information on the corresponding number of proteins per category can be found in Supporting Table S1.

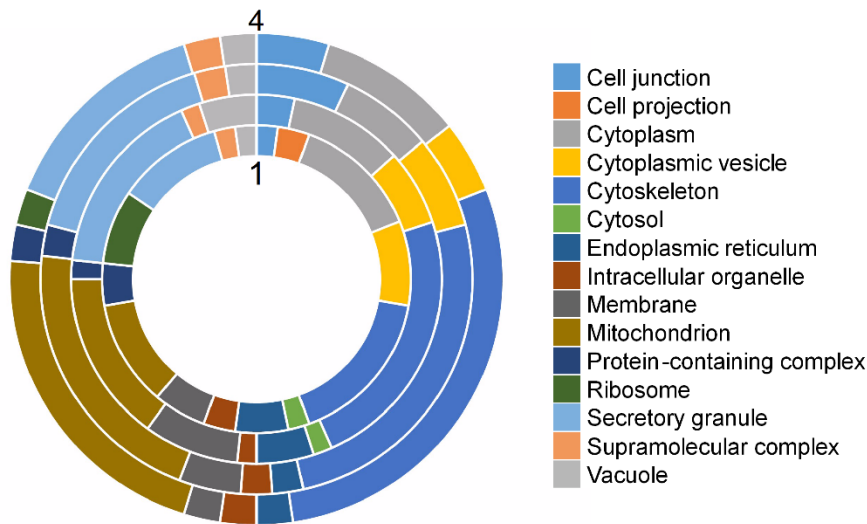

Circle 1 (inner circle) = Before MSI - PEN membrane slide  
 Circle 2 = Before MSI - ITO slide  
 Circle 3 = After negative mode MSI - ITO slide  
 Circle 4 (outer circle) = After negative mode MSI - IntelliSlide™

**Supporting Figure S4. Cellular components found in frozen tissue before MALDI-MSI (circle 1; PEN membrane slide, 2; ITO slide) and after negative lipid MALDI-MSI (circle 3; ITO slide, 4; IntelliSlide™).** All components with a  $p$ -value  $< 0.05$  were considered. The corresponding number of proteins per category can be found in Supporting Table S4.

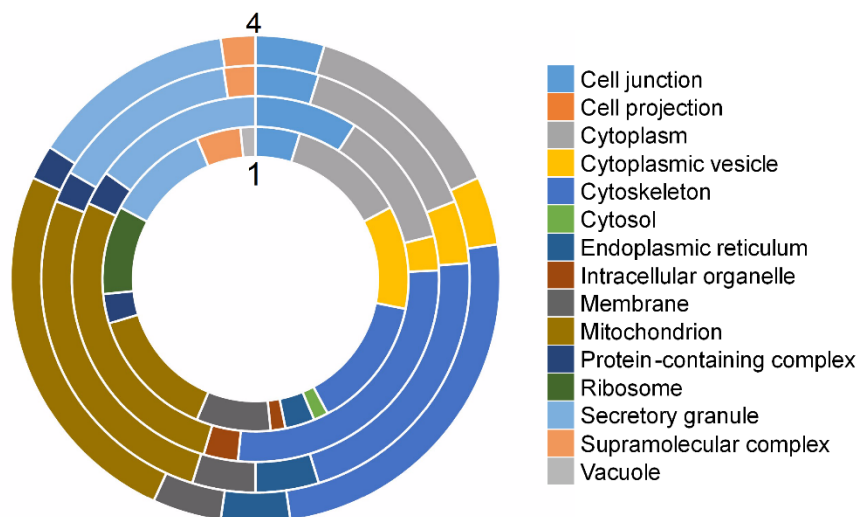

Circle 1 (inner circle) = Before MSI - PEN membrane slide

Circle 2 = Before MSI - ITO slide

Circle 3 = After MSI - ITO slide

Circle 4 (outer circle) = After MSI - IntelliSlide™

**Supporting Figure S5. All cellular components found in FFPE tissue before (circle 1; PEN membrane slide, 2; ITO slide) and after metabolite MALDI-MSI (circle 3; ITO slide, 4; IntelliSlide™).** Components with  $p$ -value $<0.05$  were considered. The corresponding number of proteins per category can be found in Supporting Table S5.

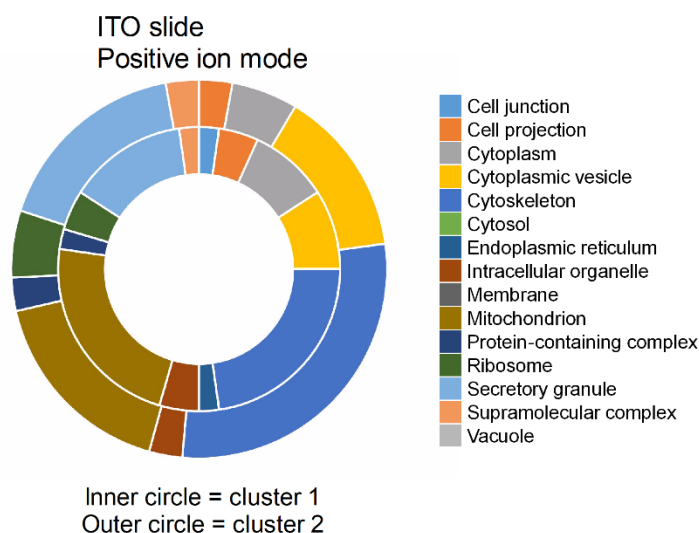

**Supporting Figure S6. Cellular component analysis of the significant ( $p<0.05$ ) components found in the two clusters dissected after positive lipid MALDI-MSI.** The corresponding number of proteins per category can be found in Supporting Table S6.

**Supporting Table S1. Number of cellular components and proteins after LMD on both frozen and FFPE tissue.** The components were clustered and shown in alphabetical order. The column ‘CC’ contains the number of cellular components per category and ‘protein’ the number of proteins present in the category.

|                                   | Frozen tissue      |         |           |         | FFPE tissue        |         |           |         |
|-----------------------------------|--------------------|---------|-----------|---------|--------------------|---------|-----------|---------|
|                                   | PEN membrane slide |         | ITO slide |         | PEN membrane slide |         | ITO slide |         |
|                                   | CC (n=87)          | protein | CC (n=38) | protein | CC (n=72)          | protein | CC (n=11) | protein |
| <b>Cell junction</b>              | 2                  | 66      | 3         | 16      | 3                  | 54      |           |         |
| <b>Cell projection</b>            | 5                  | 18      |           |         | 1                  | 2       | 1         | 1       |
| <b>Cytoplasm</b>                  | 10                 | 80      | 3         | 11      | 7                  | 60      |           |         |
| <b>Cytoplasmic vesicle</b>        | 7                  | 75      | 2         | 9       | 5                  | 39      |           |         |
| <b>Cytoskeleton</b>               | 14                 | 172     | 10        | 58      | 10                 | 107     | 6         | 17      |
| <b>Cytosol</b>                    | 3                  | 37      |           |         | 1                  | 23      |           |         |
| <b>Endoplasmic reticulum</b>      | 3                  | 47      | 2         | 7       | 3                  | 25      |           |         |
| <b>Intracellular organelle</b>    | 2                  | 14      | 1         | 1       | 1                  | 5       |           |         |
| <b>Membrane</b>                   | 6                  | 32      |           |         | 7                  | 35      |           |         |
| <b>Mitochondrion</b>              | 9                  | 310     | 9         | 138     | 10                 | 389     | 1         | 2       |
| <b>Protein-containing complex</b> | 5                  | 16      | 1         | 3       | 3                  | 15      |           |         |
| <b>Ribosome</b>                   | 7                  | 78      | 1         | 2       | 7                  | 84      |           |         |
| <b>Secretory granule</b>          | 10                 | 159     | 5         | 36      | 10                 | 100     | 3         | 6       |
| <b>Supramolecular complex</b>     | 1                  | 3       | 1         | 2       | 3                  | 11      |           |         |
| <b>Vacuole</b>                    | 3                  | 33      |           |         | 1                  | 10      |           |         |

**Supporting Table S2. Top 10 cellular components for frozen and FFPE tissue comparing laser settings.** The components were clustered and shown in alphabetical order.

| Laser setting                     | Frozen tissue |   | FFPE tissue |   |
|-----------------------------------|---------------|---|-------------|---|
|                                   | A             | B | A           | B |
| <b>Cell junction</b>              | x             | x |             |   |
| <b>Cytoplasm</b>                  | x             | x | x           | x |
| <b>Cytoplasmic vesicle</b>        | x             | x |             |   |
| <b>Cytoskeleton</b>               |               |   | x           | x |
| <b>Mitochondrion</b>              | x             | x | x           | x |
| <b>Protein-containing complex</b> |               |   |             | x |
| <b>Secretory granule</b>          | x             | x |             | x |

**Supporting Table S3. Top 10 cellular components from conductive slide before and after MALDI-MSI.** The top 10 most significant components were clustered and shown in alphabetical order.

|                                   | Frozen tissue |       |               | FFPE Tissue |       |               |
|-----------------------------------|---------------|-------|---------------|-------------|-------|---------------|
|                                   | Before        | After |               | Before      | After |               |
|                                   | ITO           | ITO   | Intelli Slide | ITO         | ITO   | Intelli Slide |
| <b>polarity</b>                   |               | +/-   | +/-           |             | -     | -             |
| <b>Cell junction</b>              | x             |       |               |             | x     | x             |
| <b>Cytoplasm</b>                  | x             | x/x   | x/x           | x           |       |               |
| <b>Cytoplasmic vesicle</b>        | x             |       | x/0           |             |       |               |
| <b>Cytoskeleton</b>               |               | x/x   | x/x           | x           | x     | x             |
| <b>Mitochondrion</b>              | x             | x/x   | x/x           | x           | x     | x             |
| <b>Protein-containing complex</b> |               |       |               | x           |       |               |
| <b>Secretory granule</b>          | x             | 0/x   | x/x           | x           |       |               |

**Supporting Table S4. Number of cellular components and proteins from frozen tissue before and after (positive or negative) lipid MALDI-MSI.** The components were clustered and shown in alphabetical order. The column ‘CC’ contains the number of cellular components per category and ‘protein’ the number of proteins present in the category.

|                                   | Before MSI   |         |           |         | After positive mode lipid MSI |         |               |         | After negative mode lipid MSI |         |               |         |
|-----------------------------------|--------------|---------|-----------|---------|-------------------------------|---------|---------------|---------|-------------------------------|---------|---------------|---------|
|                                   | PEN membrane |         | ITO       |         | ITO                           |         | IntelliSlide™ |         | ITO                           |         | IntelliSlide™ |         |
|                                   | CC (n=90)    | protein | CC (n=60) | protein | CC (n=40)                     | protein | CC (n=46)     | protein | CC (n=43)                     | protein | CC (n=42)     | protein |
| <b>Cell junction</b>              | 2            | 64      | 2         | 31      |                               |         |               |         | 3                             | 12      | 2             | 8       |
| <b>Cell projection</b>            | 3            | 14      |           |         | 1                             | 2       | 3             | 6       |                               |         |               |         |
| <b>Cytoplasm</b>                  | 12           | 96      | 6         | 33      | 2                             | 9       | 2             | 9       | 3                             | 12      | 4             | 14      |
| <b>Cytoplasmic vesicle</b>        | 8            | 90      | 4         | 45      | 5                             | 12      | 6             | 16      | 3                             | 17      | 2             | 10      |
| <b>Cytoskeleton</b>               | 15           | 154     | 14        | 96      | 10                            | 51      | 10            | 50      | 11                            | 68      | 12            | 66      |
| <b>Cytosol</b>                    | 2            | 38      | 1         | 6       |                               |         |               |         |                               |         |               |         |
| <b>Endoplasmic reticulum</b>      | 5            | 46      | 3         | 22      | 1                             | 2       | 1             | 2       | 1                             | 2       | 1             | 2       |
| <b>Intracellular organelle</b>    | 3            | 16      | 1         | 5       | 1                             | 1       | 1             | 1       | 1                             | 3       | 1             | 1       |
| <b>Membrane</b>                   | 5            | 31      | 5         | 24      | 1                             | 2       | 4             | 4       | 2                             | 3       | 1             | 1       |
| <b>Mitochondrion</b>              | 10           | 321     | 9         | 224     | 9                             | 120     | 9             | 110     | 9                             | 160     | 9             | 138     |
| <b>Protein-containing complex</b> | 4            | 16      | 1         | 3       | 1                             | 2       | 1             | 1       | 1                             | 2       | 1             | 2       |
| <b>Ribosome</b>                   | 7            | 92      |           |         | 2                             | 4       | 2             | 4       |                               |         | 1             | 2       |
| <b>Secretory granule</b>          | 10           | 165     | 10        | 124     | 6                             | 24      | 6             | 25      | 7                             | 51      | 6             | 39      |
| <b>Supramolecular complex</b>     | 2            | 8       | 1         | 2       | 1                             | 2       | 1             | 2       | 1                             | 2       | 1             | 2       |
| <b>Vacuole</b>                    | 2            | 23      | 3         | 24      |                               |         |               |         | 1                             | 5       | 1             | 4       |

**Supporting Table S5. Number of cellular components and proteins from FFPE tissue before and after metabolite MALDI-MSI.** The components were clustered and shown in alphabetical order. The column ‘CC’ contains the number of cellular components per category and ‘protein’ the number of proteins present in the category.

|                                   | Before MSI   |         |           |         | After metabolite MSI |         |               |         |
|-----------------------------------|--------------|---------|-----------|---------|----------------------|---------|---------------|---------|
|                                   | PEN membrane |         | ITO       |         | ITO                  |         | IntelliSlide™ |         |
|                                   | CC (n=64)    | protein | CC (n=33) | protein | CC (n=42)            | protein | CC (n=44)     | protein |
| <b>Cell junction</b>              | 3            | 46      | 3         | 9       | 2                    | 26      | 2             | 26      |
| <b>Cell projection</b>            |              |         |           |         |                      |         |               |         |
| <b>Cytoplasm</b>                  | 8            | 50      | 4         | 14      | 6                    | 24      | 6             | 26      |
| <b>Cytoplasmic vesicle</b>        | 7            | 49      | 1         | 5       | 2                    | 16      | 2             | 16      |
| <b>Cytoskeleton</b>               | 9            | 88      | 9         | 48      | 9                    | 90      | 11            | 102     |
| <b>Cytosol</b>                    | 1            | 18      |           |         |                      |         |               |         |
| <b>Endoplasmic reticulum</b>      | 2            | 21      |           |         | 2                    | 12      | 2             | 12      |
| <b>Intracellular organelle</b>    | 1            | 7       | 1         | 1       |                      |         |               |         |
| <b>Membrane</b>                   | 5            | 26      |           |         | 2                    | 5       | 2             | 5       |
| <b>Mitochondrion</b>              | 9            | 366     | 9         | 145     | 11                   | 280     | 11            | 293     |
| <b>Protein-containing complex</b> | 2            | 7       | 1         | 3       | 1                    | 3       | 1             | 3       |
| <b>Ribosome</b>                   | 6            | 65      |           |         |                      |         |               |         |
| <b>Secretory granule</b>          | 7            | 85      | 5         | 29      | 6                    | 55      | 6             | 56      |
| <b>Supramolecular complex</b>     | 3            | 9       |           |         | 1                    | 2       | 1             | 2       |
| <b>Vacuole</b>                    | 1            | 10      |           |         |                      |         |               |         |

**Supporting Table S6: Number of cellular components and proteins from cluster 1 and 2 after positive lipid MALDI-MSI.**

The components were clustered and shown in alphabetical order. The column 'CC' contains the number of cellular components per category and 'protein' the number of proteins present in the category.

|                            | Cluster 1 |         | Cluster 2 |         |
|----------------------------|-----------|---------|-----------|---------|
|                            | CC (n=44) | protein | CC (n=35) | protein |
| Cell junction              | 1         | 5       |           |         |
| Cell projection            | 2         | 3       | 1         | 1       |
| Cytoplasm                  | 4         | 13      | 2         | 8       |
| Cytoplasmic vesicle        | 4         | 9       | 5         | 11      |
| Cytoskeleton               | 10        | 49      | 10        | 47      |
| Cytosol                    |           |         |           |         |
| Endoplasmic reticulum      | 1         | 2       |           |         |
| Intracellular organelle    | 2         | 3       | 1         | 1       |
| Membrane                   |           |         |           |         |
| Mitochondrion              | 10        | 113     | 6         | 52      |
| Protein-containing complex | 1         | 2       | 1         | 1       |
| Ribosome                   | 2         | 4       | 2         | 4       |
| Secretory granule          | 6         | 23      | 6         | 24      |
| Supramolecular complex     | 1         | 2       | 1         | 2       |
| Vacuole                    |           |         |           |         |

**Supporting Table S7. Pathway analysis from clusters 1 and 2 after positive lipid MALDI-MSI.** All significant pathways ( $p < 0.05$ ) were included and displayed in alphabetical order.

| Common pathways, n=41                                            | Specific for cluster 1, n=29                                                  | Specific for cluster 2, n=33                                           |
|------------------------------------------------------------------|-------------------------------------------------------------------------------|------------------------------------------------------------------------|
| AUF1 (hnRNP D0) binds and destabilizes mRNA                      | Activation of caspases through apoptosome-mediated cleavage                   | Assembly of the HIV virion                                             |
| Beta oxidation of lauroyl-CoA to decanoyl-CoA-CoA                | Acyl chain remodeling of CL                                                   | Association of licensing factors with the pre-replicative complex      |
| Binding and uptake of ligands by scavenger receptors             | Amino acid synthesis and interconversion (transamination)                     | Cell-extracellular matrix interactions                                 |
| CHL1 interactions                                                | Apoptotic factor-mediated response                                            | Constitutive Signaling by NOTCH1 HD domain mutants                     |
| Citric acid cycle (TCA cycle)                                    | Beta oxidation of decanoyl-CoA to octanoyl-CoA-CoA                            | Diseases of carbohydrate metabolism                                    |
| Creatine metabolism                                              | Beta oxidation of hexanoyl-CoA to butanoyl-CoA                                | Disorders of transmembrane transporters                                |
| Downregulation of ERBB4 signaling                                | Beta oxidation of octanoyl-CoA to hexanoyl-CoA                                | Downregulation of ERBB2:ERBB3 signaling                                |
| Erythrocytes take up carbon dioxide and release oxygen           | Branched-chain amino acid catabolism                                          | Glycogen breakdown (glycogenolysis)                                    |
| Erythrocytes take up oxygen and release carbon dioxide           | Cellular responses to stress                                                  | Glycogen storage diseases                                              |
| Gluconeogenesis                                                  | Complex I biogenesis                                                          | Glycogen synthesis                                                     |
| Glucose metabolism                                               | Cytochrome c-mediated apoptotic response                                      | Hemostasis                                                             |
| Glycolysis                                                       | Detoxification of reactive oxygen Species                                     | IRAK2 mediated activation of TAK1 complex                              |
| Lipid digestion, mobilization, and transport                     | Fatty acid, triacylglycerol, and ketone body metabolism                       | IRAK2 mediated activation of TAK1 complex upon TLR7/8 or 9 stimulation |
| Metabolism                                                       | Fructose metabolism                                                           | MAP3K8 (TPL2)-dependent MAPK1/3 activation                             |
| Metabolism of amino acids and derivatives                        | Glyoxylate metabolism and glycine degradation                                 | Membrane binding and targeting of GAG proteins                         |
| Metabolism of carbohydrates                                      | Histidine, lysine, phenylalanine, tyrosine, proline and tryptophan catabolism | Membrane trafficking                                                   |
| Metabolism of polyamines                                         | Hormone-sensitive lipase (HSL)-mediated triacylglycerol hydrolysis            | Myoclonic epilepsy of Lafora                                           |
| mitochondrial fatty acid beta-oxidation of saturated fatty acids | Ion homeostasis                                                               | NF- $\kappa$ B is activated and signals survival                       |

|                                                                                                                     |                                                    |                                                                                     |
|---------------------------------------------------------------------------------------------------------------------|----------------------------------------------------|-------------------------------------------------------------------------------------|
| mitochondrial fatty acid beta-oxidation of unsaturated fatty acids                                                  | Ketone body metabolism                             | NRIF signals cell death from the nucleus                                            |
| Mitochondrial protein import                                                                                        | Lysine catabolism                                  | p75NTR recruits signaling complexes                                                 |
| Mitophagy                                                                                                           | Metabolism of lipids and lipoproteins              | p75NTR signals via NF-kB                                                            |
| Muscle contraction                                                                                                  | Methionine salvage pathway                         | Receptor-ligand binding initiates the second proteolytic cleavage of Notch receptor |
| O2/CO2 exchange in erythrocytes                                                                                     | Mitochondrial fatty acid Beta-Oxidation            | Recycling of bile acids and salts                                                   |
| Pink/Parkin mediated mitophagy                                                                                      | Neurotransmitter clearance in the synaptic cleft   | Reduction of cytosolic Ca <sup>++</sup> levels                                      |
| Platelet activation, signaling and aggregation                                                                      | Pregnenolone biosynthesis                          | Regulation of innate immune responses to cytosolic DNA                              |
| Platelet degranulation                                                                                              | Regulation of pyruvate dehydrogenase (PDH) complex | Regulation of PLK1 activity at G2/M transition                                      |
| PTK6 regulates RTKs and their effectors AKT1 and DOK1                                                               | Signaling by retinoic acid                         | Signaling by NOTCH1 HD domain mutants in cancer                                     |
| Pyruvate metabolism                                                                                                 | Synthesis of ketone bodies                         | Spry regulation of FGF signaling                                                    |
| Pyruvate metabolism and citric acid (TCA) cycle                                                                     | Transcriptional regulation by TP53                 | Synthesis and processing of GAG, GAGPOL polyproteins                                |
| Regulation of cytoskeletal remodeling and cell spreading by IPP complex components                                  |                                                    | TGF-beta receptor signaling in EMT (epithelial to mesenchymal transition)           |
| Regulation of mRNA stability by proteins that bind AU-rich elements                                                 |                                                    | TRAF6 mediated induction of TAK1 complex                                            |
| Respiratory electron transport                                                                                      |                                                    | Translesion synthesis by REV1                                                       |
| Respiratory electron transport, ATP synthesis by chemiosmotic coupling, and heat production by uncoupling proteins. |                                                    | Transport of organic anions                                                         |
| Response to elevated platelet cytosolic Ca <sup>2+</sup>                                                            |                                                    |                                                                                     |
| Scavenging of heme from plasma                                                                                      |                                                    |                                                                                     |
| SLC transporter disorders                                                                                           |                                                    |                                                                                     |
| Striated muscle contraction                                                                                         |                                                    |                                                                                     |
| The citric acid (TCA) cycle and respiratory electron transport                                                      |                                                    |                                                                                     |
| TP53 regulates metabolic genes                                                                                      |                                                    |                                                                                     |
| Translocation of GLUT4 to the plasma membrane                                                                       |                                                    |                                                                                     |
| Vesicle-mediated transport                                                                                          |                                                    |                                                                                     |
